# Supplementary material
Source: MDPI journal article supplement (https://www.mdpi.com/2504-477X/7/10/444)
Supplement: s1 [file s1]

# Biomass Derived High Porous Carbon via CO<sub>2</sub> Activation for Supercapacitor Electrodes

Azamat Taurbekov<sup>1,2,7</sup>, Alisher Abdisattar<sup>1,3</sup>, Meiram Atamanov<sup>1,2</sup>, Mukhtar Yeleuov<sup>1,3,7</sup>,  
Chingis Daulbayev<sup>4,5</sup>, Kysdyr Askaruly<sup>1,3,7</sup>, Bayan Kaidar<sup>1</sup>, Zulkhair Mansurov<sup>1,2</sup>,  
Jimena Castro-Gutierrez<sup>6</sup>, Alain Celzard<sup>6</sup>, Vanessa Fierro<sup>6</sup>, Tolganay Atamanova<sup>1,2</sup>

\*\*E-mail address: [tolganay.temirgaliyeva@gmail.com](mailto:tolganay.temirgaliyeva@gmail.com)

Table S1 – References considered in Figure 1

- [a] WS - 1868 Serafin, J., Dziejarski, B., Junior, O. F. C., & Sreńscek-Nazzal, J. (2023). Design of highly microporous activated carbons based on walnut shell biomass for H<sub>2</sub> and CO<sub>2</sub> storage. *Carbon*, 201, 633-647.
- [b] WS - 1800 Yang, J., & Qiu, K. (2010). Preparation of activated carbons from walnut shells via vacuum chemical activation and their application for methylene blue removal. *Chemical Engineering Journal*, 165(1), 209-217.
- [c] AS - Ozcimen D, Ersoy-Mericboyu A. Adsorption of copper(II) ions onto hazelnut shell and apricot stone activated carbons. *Adsorp Sci Technol* 2010;28 (4):327-41.
- [d] BB - 2221 G. Zhang, Y. Chen, Y. Chen, H. Guo, Activated biomass carbon made from bamboo as electrode material for supercapacitors, *Mater. Res Bull.* vol. 102 (. 2018), <https://doi.org/10.1016/j.materresbull.2018.03.006>.
- [e] BB - 1432 Q.-S. Liu, T. Zheng, P. Wang, L. Guo, Preparation and characterization of activated carbon from bamboo by microwave-induced phosphoric acid activation, *Ind. Crops Prod.* vol. 31 (2) (2010) 233-238
- [f] CS - 794 H. Deng, L. Yang, G. Tao, J. Dai, Preparation and characterization of carbon from cotton stalk by microwave assisted chemical activation – application in methylene blue adsorption from aqueous solution, *J. Hazard Mater.* vol. 166 (2009) 1514-1521, <https://doi.org/10.1016/j.jhazmat.2008.12.080>.
- [g] CS - 1412 M. Chen, et al., Preparation of activated carbon from cotton stalk and its application in supercapacitor, *J. Solid State Electrochem.* vol. 17 (2012), <https://doi.org/10.1007/s10008-012-1946-6>. [h] CS - 1964 X. Tian, et al., Flute type micropores activated carbon from cotton stalk for high performance supercapacitors, *J. Power Sources* vol. 359 (2017) 88-96, <https://doi.org/10.1016/j.jpowsour.2017.05.054>.
- [i] CoS - 1845 E. Taer, A. Apriwandi, A. Agustino, M.R. Dewi, R. Taslim, Porous hollow biomassbased carbon nanofiber/nanosheet for high-performance supercapacitor, *Int. J. Energy Res.* 46 (2022) 1467-1480, <https://doi.org/10.1002/er.7262>.
- [j] PS - 1493 S. Wang, H. Nam, H. Nam, Preparation of activated carbon from peanut shell with KOH activation and its application for H<sub>2</sub>S adsorption in confined space, *J. Environ. Chem. Eng.* 8 (2020), 103683, <https://doi.org/10.1016/j.jece.2020.103683>.
- [k] CoS - 783 A.L. Cazzetta, A.M.M. Vargas, E.M. Nogami, M.H. Kunita, M.R. Guilherme, A. C. Martins, T.L. Silva, J.C.G. Moraes, V.C. Almeida, NaOH-activated carbon of high surface area produced from coconut shell: kinetics and equilibrium studies from the methylene blue adsorption, *Chem. Eng. J.* 174 (2011) 117-125, <https://doi.org/10.1016/j.cej.2011.08.058>.
- [l] WC - 1003 C.F. Wang, C.L. Wu, S.W. Kuo, W.S. Hung, K.J. Lee, H.C. Tsai, C.J. Chang, J.Y. Lai, Preparation of efficient photothermal materials from waste coffee grounds for solar evaporation and water purification, *Sci. Rep.* 10 (2020) 1-10, <https://doi.org/10.1038/s41598-020-69778-2>.
- [m] WS - 1534 M. Bayat, A. Alighardashi, A. Sadeghasadi, Fixed-bed column and batch reactors performance in removal of diazinon pesticide from aqueous solutions by using walnut shell-modified activated carbon, *Environ. Technol. Innov.* 12 (2018) 148-159, <https://doi.org/10.1016/j.eti.2018.08.008>.
- [n] CoS - 935 Yağmur, H. K., & Kaya, İ. (2021). Synthesis and characterization of magnetic ZnCl<sub>2</sub>-activated carbon produced from coconut shell for the adsorption of methylene blue. *Journal of Molecular Structure*, 1232, 130071.
- [o] RH - 1365 Y. Luo, et al., The performance of phosphoric acid in the preparation of activated carbon-containing phosphorus species from rice husk residue, *J. Mater. Sci.* 54 (6) (2019) 5008-5021.
- [p] WC -1422 Wang, S., Nam, H., Lee, D., & Nam, H. (2022). H<sub>2</sub>S gas adsorption study using copper impregnated on KOH activated carbon from coffee residue for indoor air purification. *Journal of Environmental Chemical Engineering*, 10(6), 108797.
- [q] NAMANE, A., MEKARZIA, A., BENRACHEDI, K., BELHANECHBENSEMRA, N., & HELLAL, A. (2005). Determination of the adsorption capacity of activated carbon made from coffee grounds by chemical activation with ZnCl and HPO. *Journal of Hazardous Materials*, 119(1-3), 189-194. doi:10.1016/j.jhazmat.2004.12.006

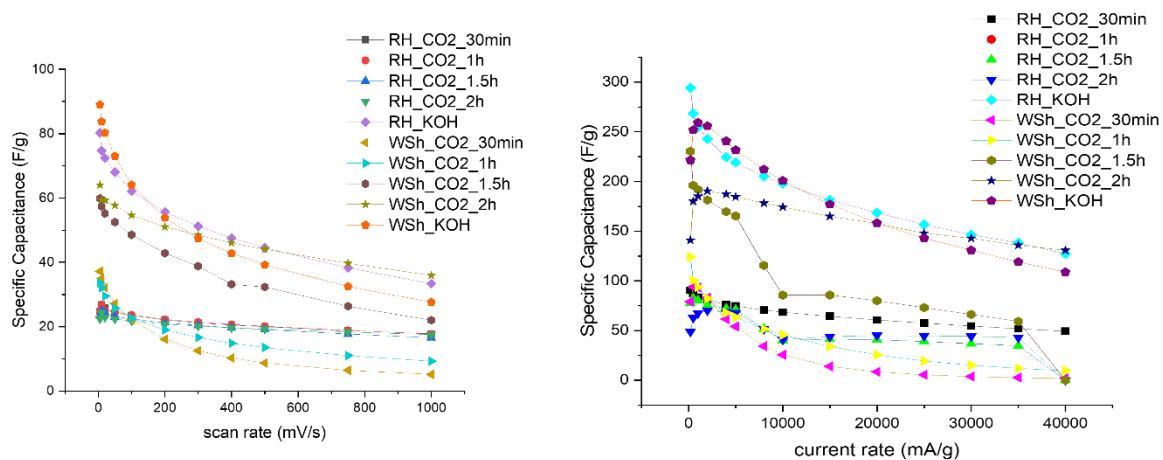

Figure S1 – Comparison of all results on specific capacitance by scan and current rate

Table S2. Comparison of the electrochemical performance of the electrodes of the present work and previous.

| Electrodes               | Electrolyte                        | Specific capacitance (GCD)                        | Specific capacitance (CV)                  |
|--------------------------|------------------------------------|---------------------------------------------------|--------------------------------------------|
| OMC-imp-7*               | 1 M H <sub>2</sub> SO <sub>4</sub> | 43 F/g at 0.5 A/g<br>18 F/g at 20 A/g             | 50 F/g at 5 mV/s<br>15.5 F/g at 500 mV/s   |
| OMC-pm-5*                | 1 M H <sub>2</sub> SO <sub>4</sub> | 49 F/g at 0.5 A/g<br>25 F/g at 20A/g              | 50 F/g at 5 mV/s<br>18 F/g at 500 mV/s;    |
| OMC-pm-4*                | 1 M H <sub>2</sub> SO <sub>4</sub> | 49 F/g at 0.5 A/g<br>about 14 F/g at 20 A/g       |                                            |
| OMC-CO <sub>2</sub> -75* | 1 M H <sub>2</sub> SO <sub>4</sub> | about 36 F/g at 0.5 A/g<br>about 11 F/g at 20 A/g |                                            |
| WS_KOH                   | 1 M H <sub>2</sub> SO <sub>4</sub> | 148 F/g at 0.5 A/g<br>93 F/g at 20 A/g;           | 89 F/g at 5 mV/s<br>39 F/g at 500 mV/s     |
| WS_CO <sub>2</sub> _2h   | 1 M H <sub>2</sub> SO <sub>4</sub> | 106 F/g at 0.5 A/g<br>92,7 F/g at 20 A/g          | 64 F/g at 5 mV/s<br>44 F/g at 500 mV/s     |
| RH_KOH                   | 1 M H <sub>2</sub> SO <sub>4</sub> | 158 F/g at 0.5 A/g<br>99 F/g at 20 A/g            | 80.3 F/g at 5 mV/s<br>44.5 F/g at 500 mV/s |
| RH_CO <sub>2</sub> _2h   | 1 M H <sub>2</sub> SO <sub>4</sub> | 37 F/g at 0.5 A/g<br>26,5 F/g at 20 A/g           | 22,41 F/g at 5 mV/s<br>19 F/g at 500 mV/s  |

\*Ordered mesoporous carbons (OMCs) produced by a mechanochemical synthesis method from mimosa tannin. OMC-imp-7: OMC material activated by impregnation with KOH using a KOH/OMC mass ratio of 7. OMC-pm-5: OMC material activated by physical mixing with KOH using a KOH/OMC mass ratio of 5. OMC-CO<sub>2</sub>-75: OMC activated using CO<sub>2</sub> during 75 minutes.
